# Supplementary material for: Edge-effect enhanced catalytic CO oxidation by atomically dispersed Pt on nitride-graphene
Source: Royal Society of Chemistry journal article supplement (doi:10.1039/d0ta10907j), 2020-12-28
Supplement: d0ta10907j1.pdf [file d0ta10907j1.pdf]

## Supporting Information

### Edge-Effect Enhanced Catalytic CO Oxidation by Atomically Dispersed Pt on Nitride-Graphene

Chuanyi Jia <sup>a,‡</sup> Xijun Wang <sup>b,‡</sup> Huabing Yin <sup>c,‡</sup> Wenhui Zhong <sup>a</sup>, Edward Sharman <sup>d</sup>,  
Yi Luo <sup>b</sup> and Jun Jiang <sup>b,\*</sup>

<sup>a</sup>Guizhou Provincial Key Laboratory of Computational Nano-material Science,  
Institute of Applied Physics, Guizhou Education University, Guiyang, Guizhou,  
550018, China

<sup>b</sup>Hefei National Laboratory for Physical Sciences at the Microscale, iChEM  
(Collaborative Innovation Center of Chemistry for Energy Materials), CAS Center for  
Excellence in Nanoscience, School of Chemistry and Materials Science, University of  
Science and Technology of China, Hefei, Anhui, 230026, China

<sup>c</sup>Institute for Computational Materials Science, School of Physics and Electronics, International Joint Research Laboratory of New Energy Materials and Devices of Henan  
Province, Henan University, Kaifeng 475004, China

<sup>d</sup>Department of Neurology, University of California, Irvine, California 92697, United  
States

#### Corresponding Author

\*jiangjl@ustc.edu.cn. Phone: +86 551 63600029

‡C.J., X.W. and H.Y. contributed equally to this work..

## 1. Computational Details

DFT calculations were performed using the Vienna ab initio simulation package (VASP).<sup>1</sup> The Perdew, Burke and Ernzerhof (PBE) functional and the projector augmented wave (PAW) method were used to simulate geometric and electronic properties.<sup>2-5</sup> Long-range van der Waals (vdW) interactions were taken into consideration via the DFT-D2 correction method.<sup>6</sup> Geometric structures were fully relaxed until energy and forces converged to  $10^{-5}$  eV and 0.01 eV/Å, respectively. The Brillouin zone was sampled by a  $5 \times 5 \times 1$  Monkhorst-Pack k-mesh, and the kinetic energy cutoff was set to 400 eV in the plane-wave expansion.<sup>7,8</sup>

The graphene monolayer was modeled using a rectangular  $6 \times 6$  supercell with 60 carbon atoms. The vacuum region thickness separating the slabs was set to 15 Å. The DDEC6 method, which is a refinement of the Density Derived Electrostatic and Chemical (DDEC) approach, was used to analyze charge distributions.<sup>9,10</sup> Many theoretical and experimental works show that this method has excellent performance in 2D/3D solid material systems, confirming that it is reliable and accurate.<sup>11-13</sup> The climbing image nudged elastic band (CI-NEB) method was employed to search the transition states of the elementary steps along the O<sub>2</sub> activation and CO oxidation paths.<sup>14,15</sup>

The binding energy between the adsorbate and catalytic surface is calculated as:

$$E_b = E_{sur+ad} - E_{sur} - E_{ad}$$

where  $E_{sur+ad}$ ,  $E_{sur}$ , and  $E_{ad}$  represent the energies of the adsorption system, the bare surface, and the free adsorbant molecules, respectively.

## 2. Optimized Structures and Binding Energies of CO and 2CO on Pt/Gr and Pt/NGr.

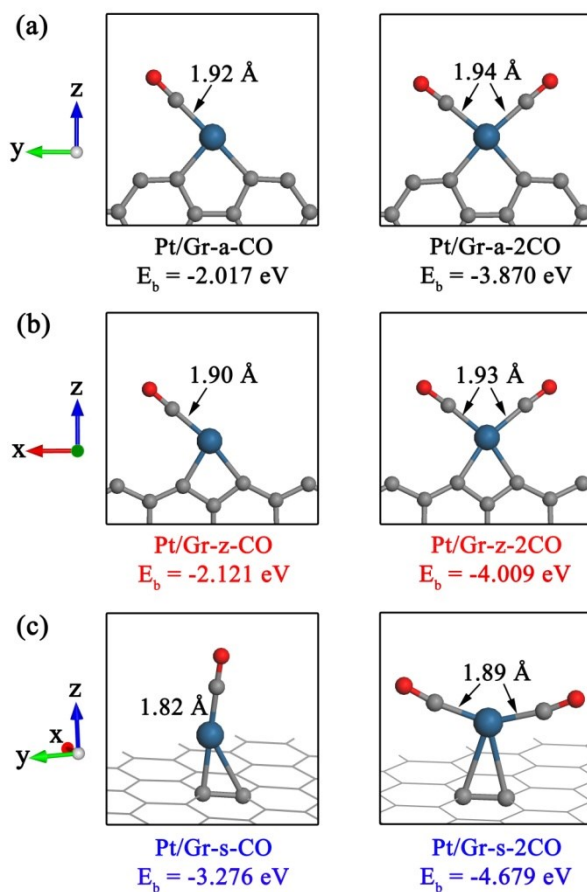

**Figure S1.** The optimized structures and binding energies of CO and 2CO on **Pt/Gr-a** (a), **Pt/Gr-z** (b) and **Pt/Gr-s** (c) surfaces. Dark blue, gray and red spheres represent Pt, C and O atoms, respectively.

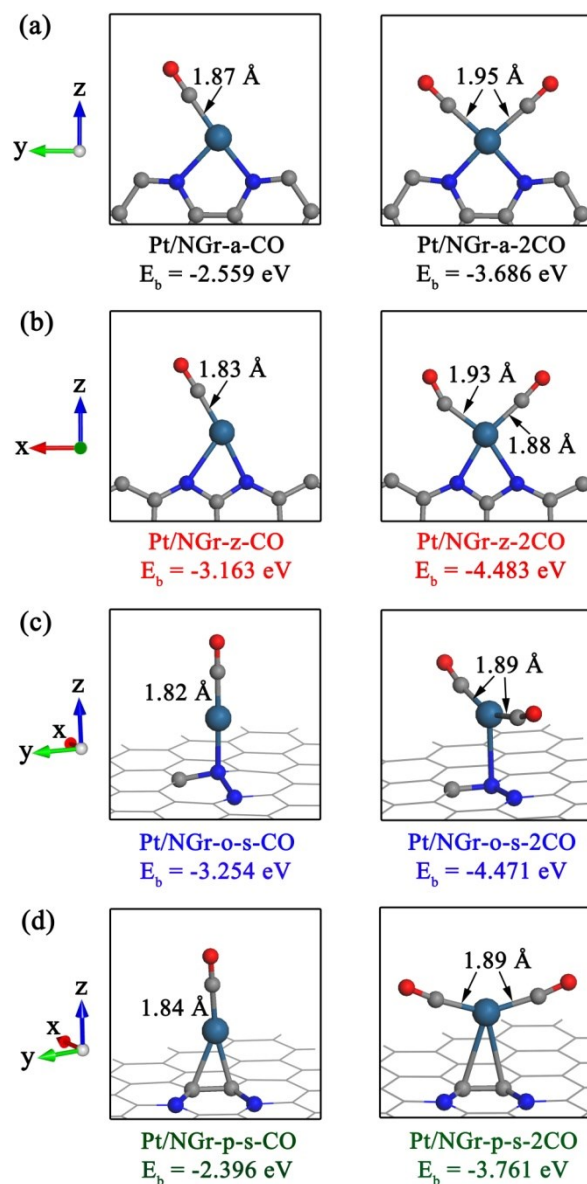

**Figure S2.** The optimized structures and binding energies of CO and 2CO on Pt/NGr-a (a), Pt/NGr-z (b), Pt/NGr-o-s (c) and Pt/NGr-p-s (d) surfaces. Blue spheres: N atoms; other atoms are colored the same as in Figure S1.

### 3. Optimized Structures and Relative Energies ( $E_{re}$ ) of the States Identified in

Figure 3. The  $E_{re}$  of the initial state (IS) are all set to 0 eV.  $E_{re} = E_{TS/FS} - E_{IS}$

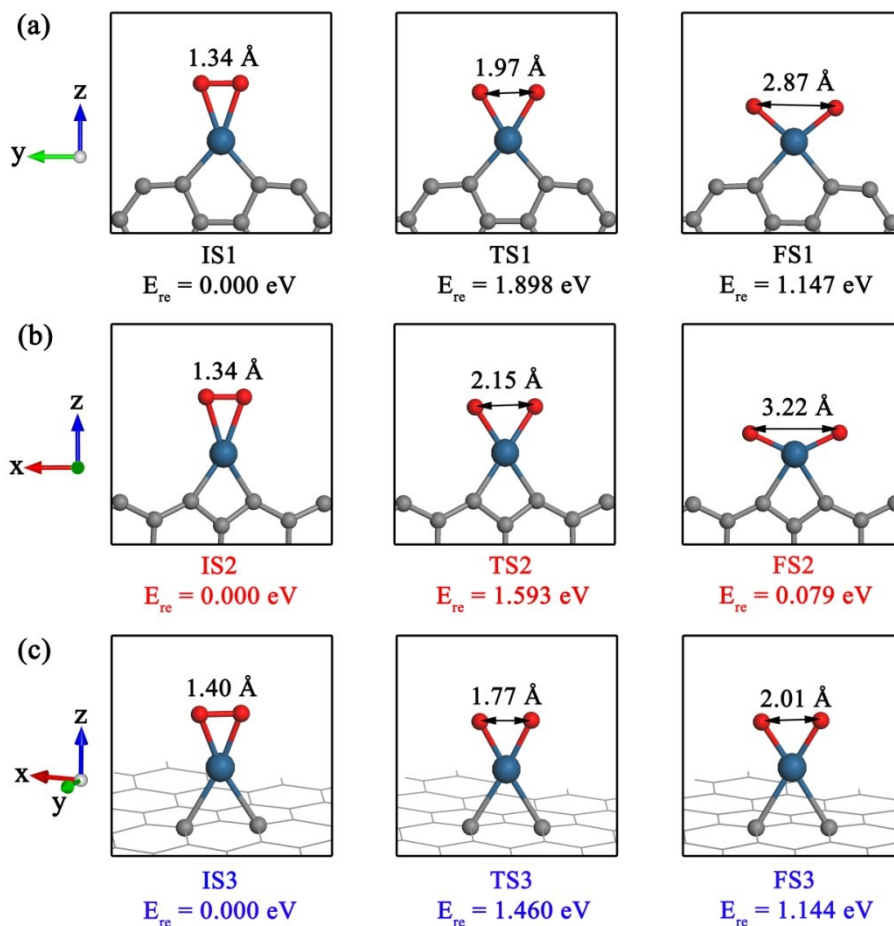

**Figure S3.** The optimized structures and relative energies of the initial (I), transition (T) and final (F) states for  $O_2$  activation on **Pt/Gr-a** (a), **Pt/Gr-z** (b) and **Pt/Gr-s** (c) surfaces (Figure 3a). See the Figure S1 legend for color coding.

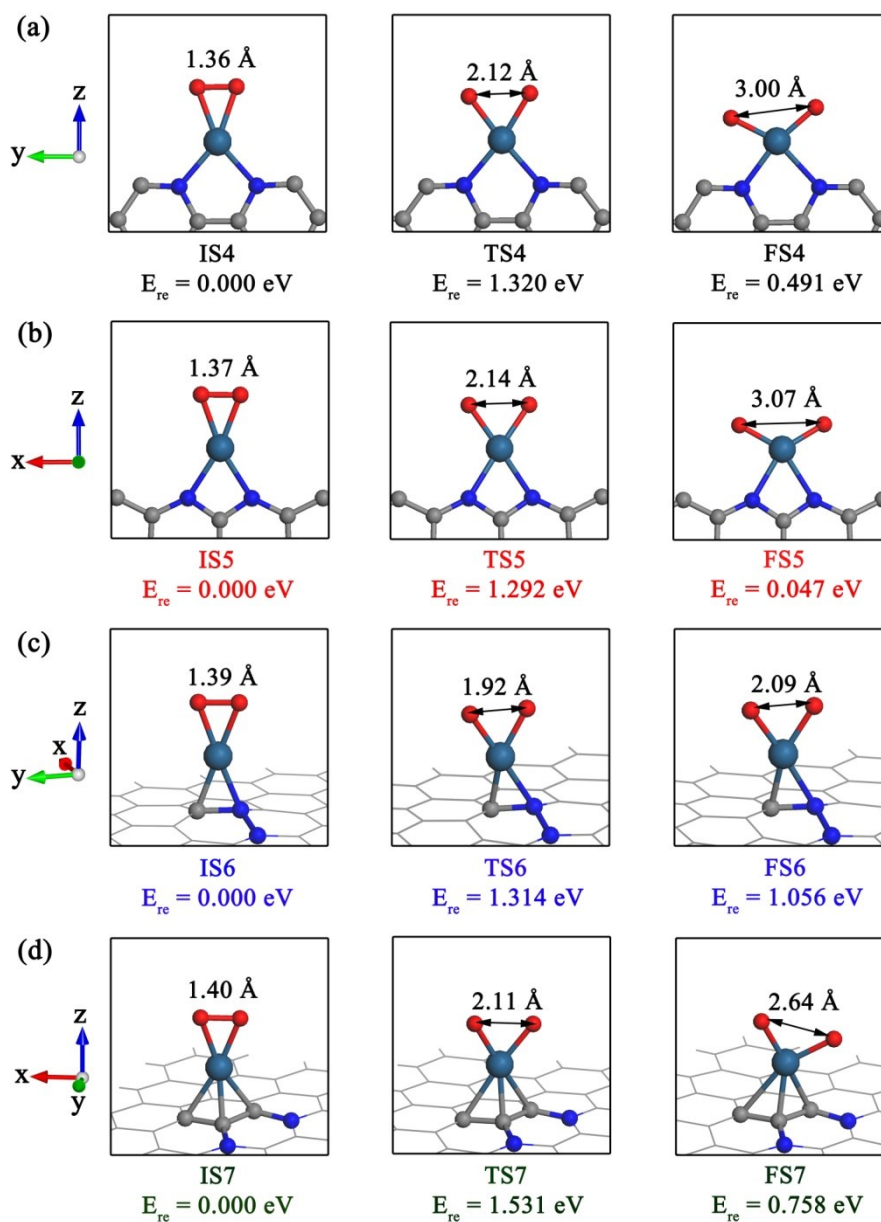

**Figure S4.** Optimized structures and relative energies of the initial (I), transition (T) and final (F) states for  $\text{O}_2$  activation on **Pt/NGr-a** (a), **Pt/NGr-z** (b), **Pt/NGr-o-s** (c) and **Pt/NGr-p-s** (d) surfaces (Figure 3b). See the Figure S2 legend for color coding.

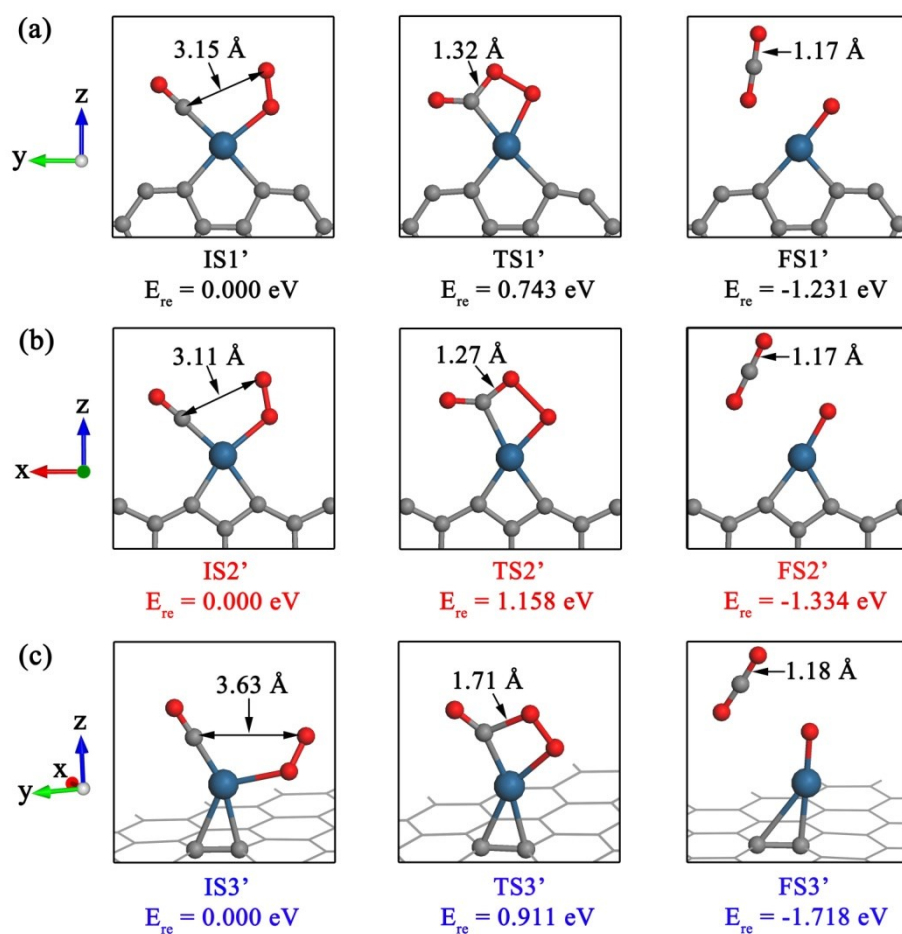

**Figure S5.** Optimized structures and relative energies of the initial (I), transition (T) and final (F) states for the CO+O<sub>2</sub> reaction on **Pt/Gr-a** (a), **Pt/Gr-z** (b) and **Pt/Gr-s** (c) surfaces (Figure 3c). See the Figure S1 legend for color coding.

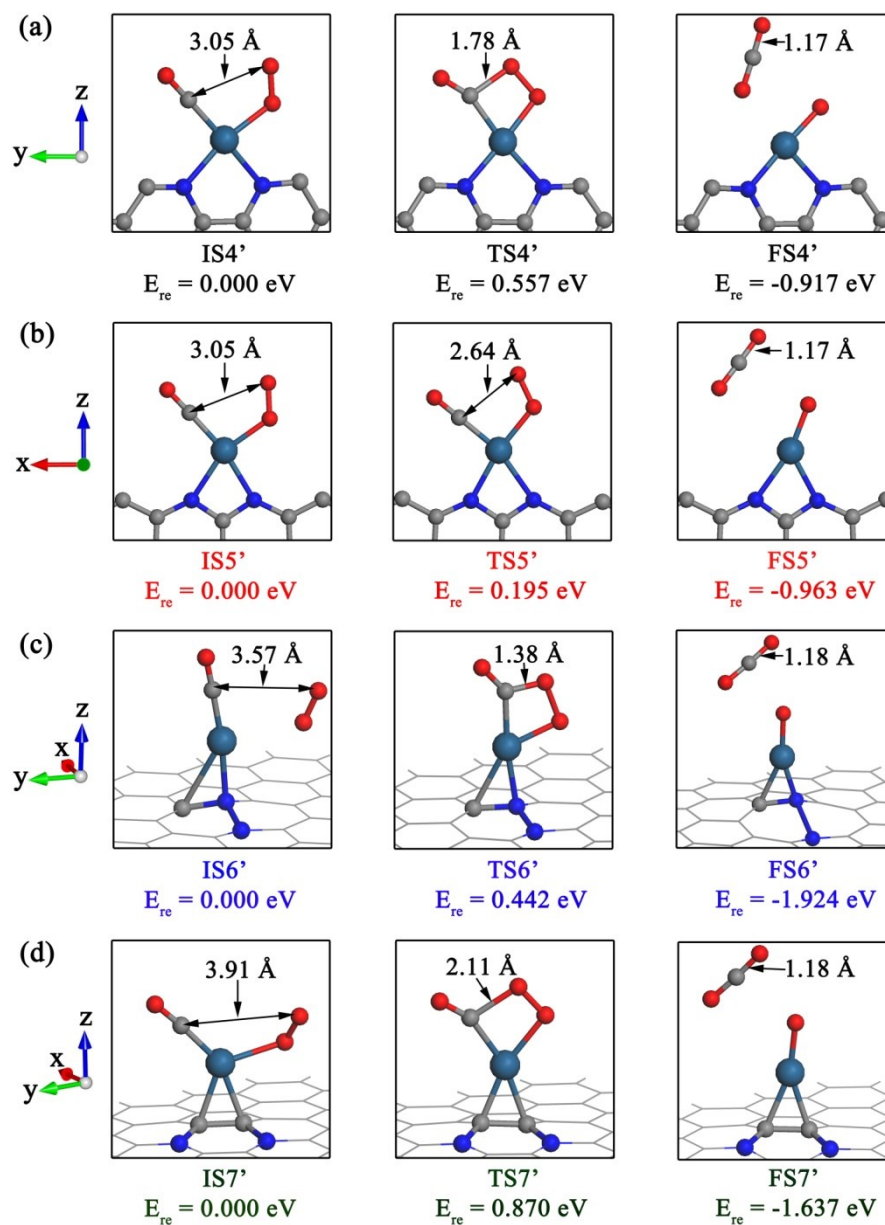

**Figure S6.** Optimized structures and relative energies of the initial (I), transition (T) and final (F) states for CO+O<sub>2</sub> reaction on **Pt/NGr-a** (a), **Pt/NGr-z** (b), **Pt/NGr-o-s** (c) and **Pt/NGr-p-s** (d) surfaces (Figure 3d). See the Figure S2 legend for color coding.



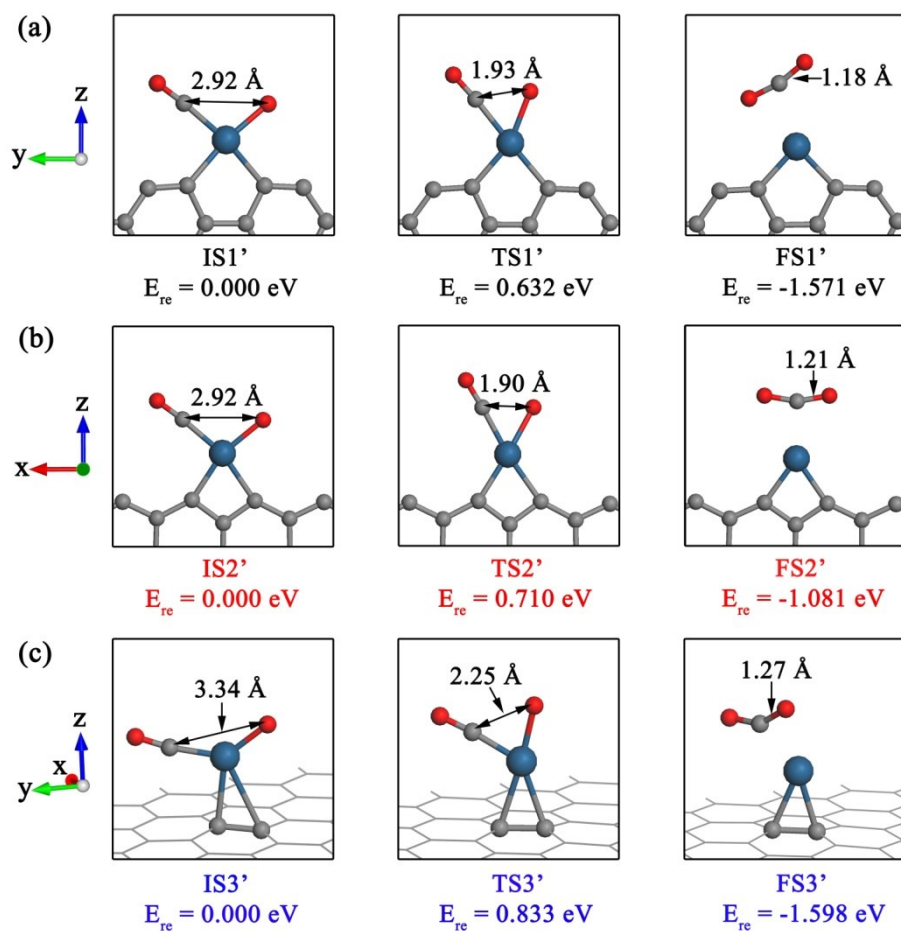

**Figure S7.** Optimized structures and relative energies of the initial (I), transition (T) and final (F) states for the CO+O reaction on **Pt/Gr-a (a)**, **Pt/Gr-z (b)** and **Pt/Gr-s (c)** surfaces (Figure 3e). See the Figure S1 legend for color coding.

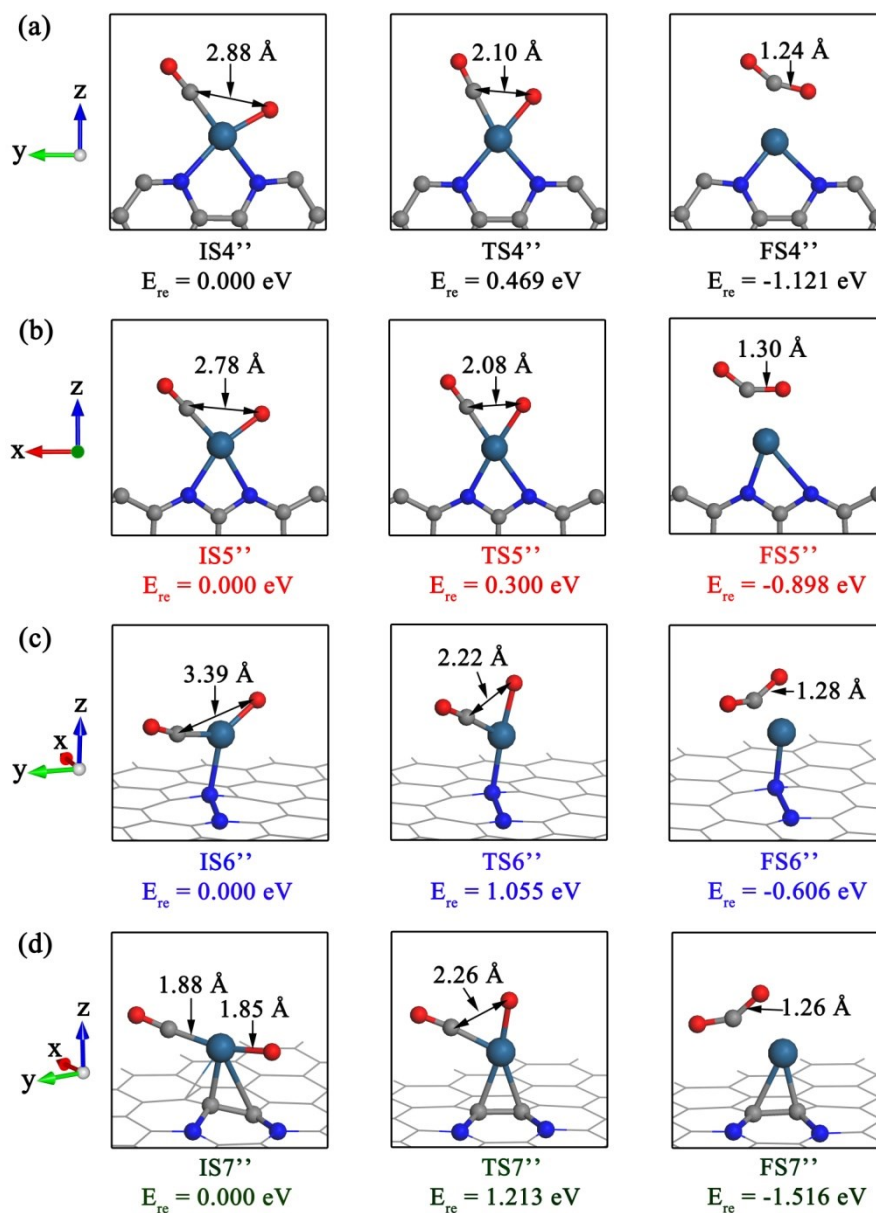

**Figure S8.** Optimized structures and relative energies of the initial (I), transition (T) and final (F) states for the CO+O reaction on **Pt/NGr-a** (a), **Pt/NGr-z** (b), **Pt/NGr-o-s** (c) and **Pt/NGr-p-s** (d) surfaces (Figure 3f). See the Figure S2 legend for color coding.

#### 4. The Convergence Test for the Embedded Model of Pt on NGr.

The calculation results for the embedded model of Pt on NGr (denoted as Pt/NGr-e) indicate that since the adsorbed  $O_2$  molecule is too close to the surface N atoms, the large repulsive forces between them jeopardize the stable adsorption of  $O_2/CO+O_2$  on the Pt site (the  $O_2$  is more inclined to stay far away from the surface). Thus, the embedded model of Pt on NGr is not suitable for  $O_2$  activation and CO oxidation investigations.

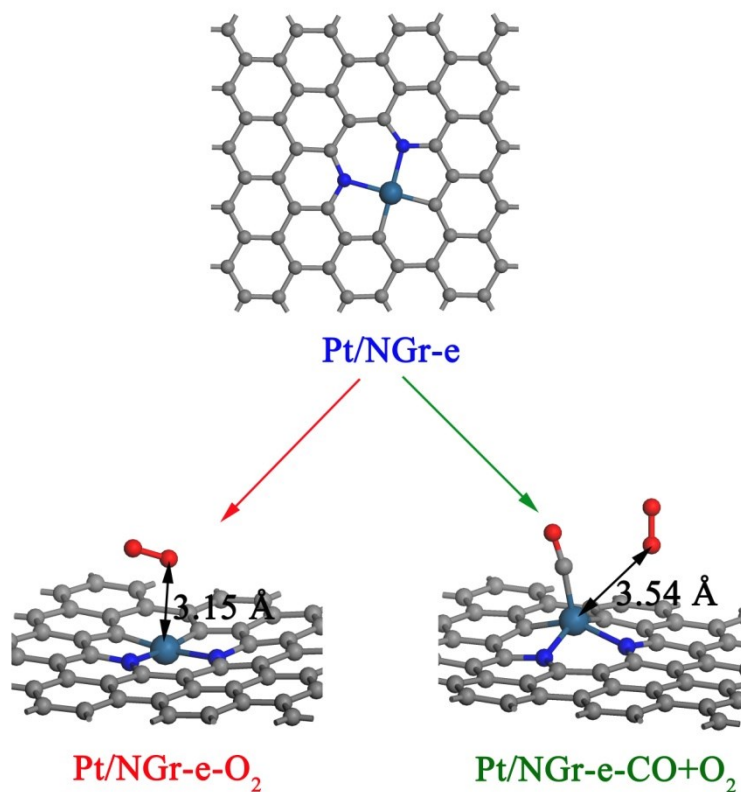

**Figure S9.** The optimized structure of the embedded model of Pt on NGr (Pt/NGr-e) and corresponding binding structures of  $O_2$  and  $CO+O_2$  on the single Pt atoms. See the Figure S2 legend for color coding.

## 5. Optimized Binding Structures and Corresponding Electronic Properties of the Pt/NGr Configurations.

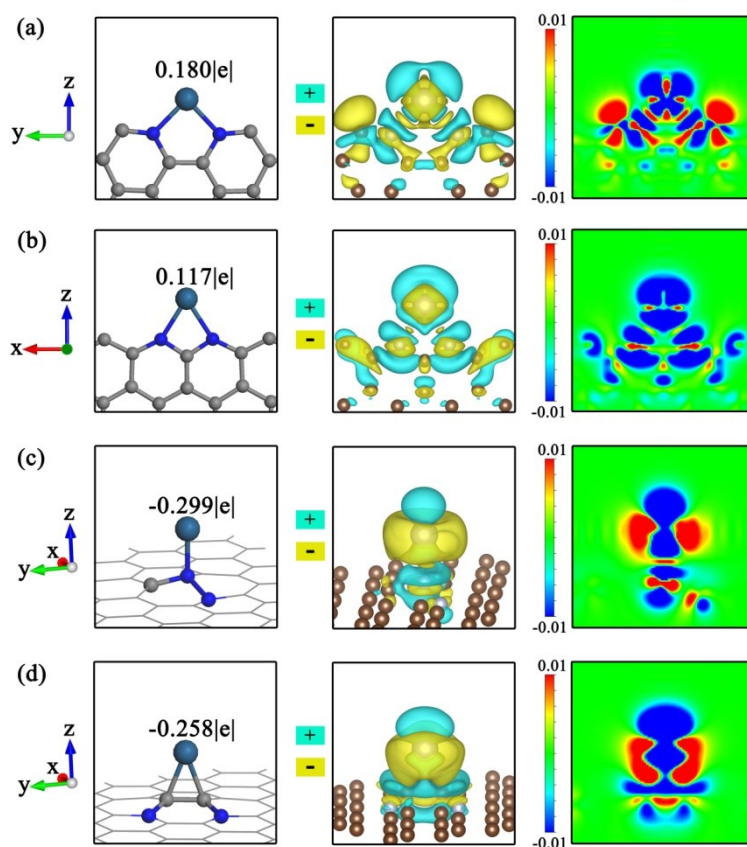

**Figure S10.** Optimized binding structures and corresponding electronic properties of the **Pt/NGr-a (a)**, **Pt/NGr-z (b)**, **Pt/NGr-o-s (c)** and **Pt/NGr-p-s (d)** configurations. **Left:** Binding structures and DDEC (density derived electrostatic and chemical) charges of Pt atoms; **Middle:** three-dimensional differential charge density maps; **Right:** two-dimensional differential charge density maps. The detailed charge density distribution is shown in Figure S12.

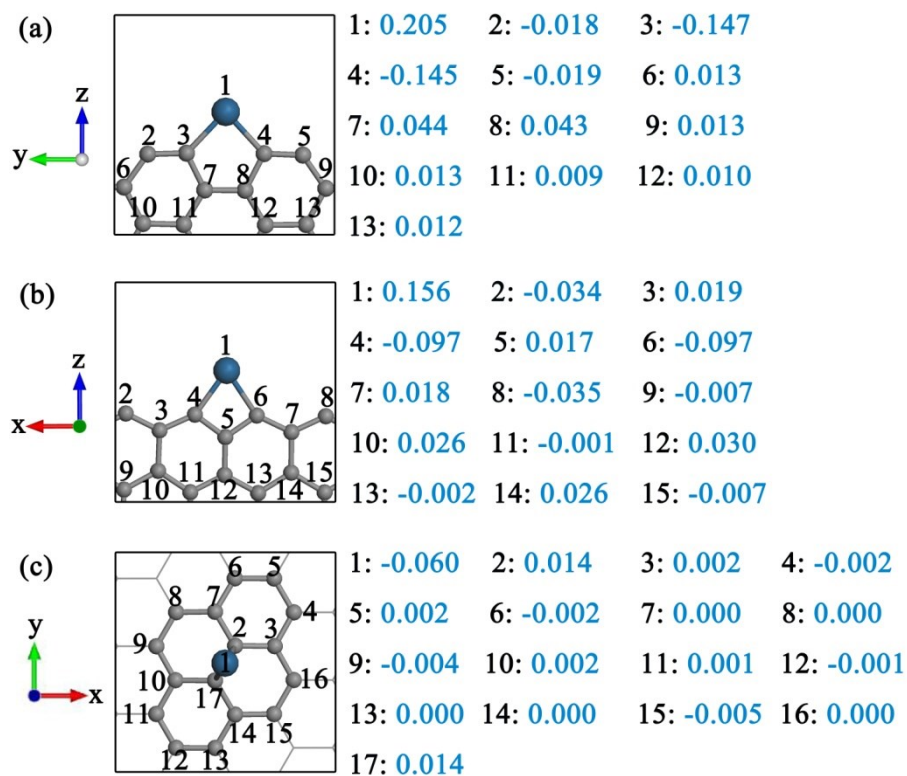

**Figure S11.** Optimized binding structures (**Left**) and corresponding charge ( $|e|$ ) density distribution (**Right**) of the **Pt/Gr-a** (a), **Pt/Gr-z** (b) and **Pt/Gr-s** (c) configurations.

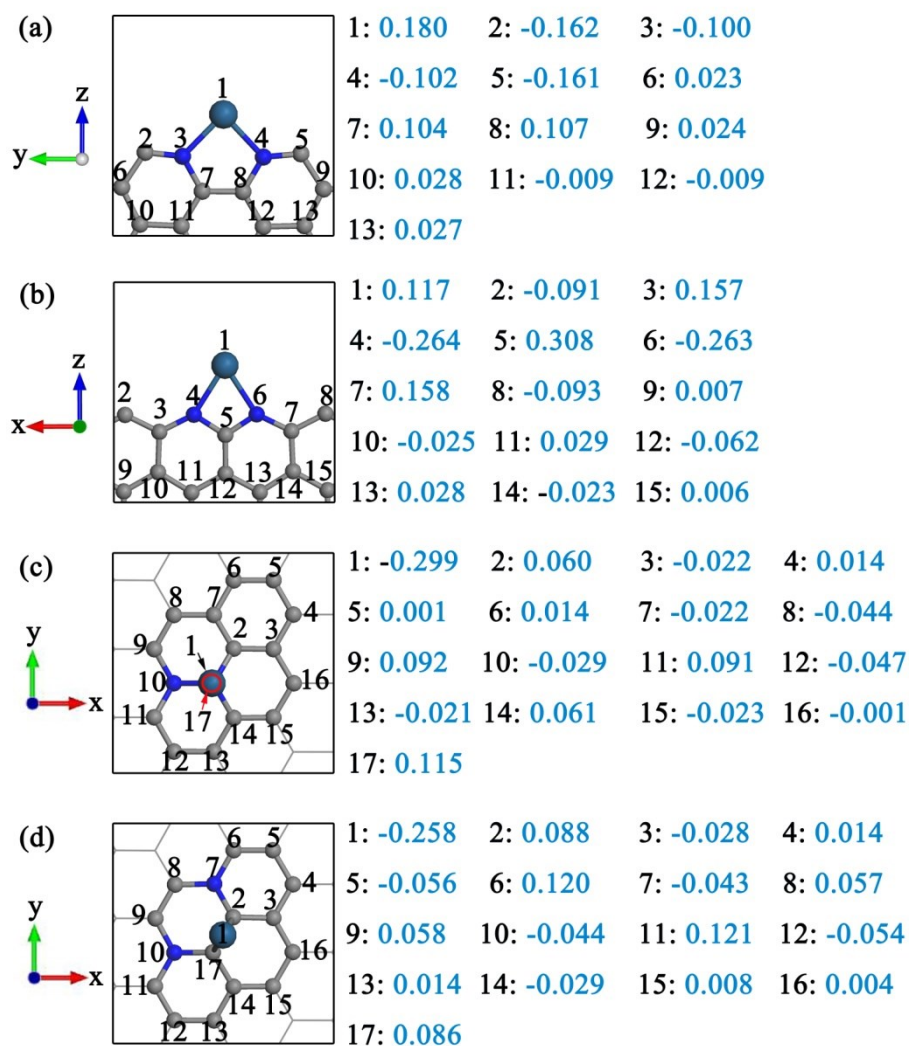

**Figure S12.** Optimized binding structures (**Left**) and corresponding charge ( $|e|$ ) density distribution (**Right**) of the **Pt/NGr-a** (a), **Pt/NGr-z** (b), **Pt/NGr-o-s** (c) and **Pt/NGr-p-s** (d) configurations.

## 6. Detailed Charge, Binding Energy and Energy Barrier Values for O<sub>2</sub> Activation, and the CO+O<sub>2</sub> and CO+O Reaction Steps.

**Table S1.** Calculated Pt and adsorbate (*ads*) charges after O<sub>2</sub>, CO+O<sub>2</sub> and CO+O adsorption; the corresponding binding energies ( $E_b$ ) and energy barriers for O<sub>2</sub> activation, and the CO+O<sub>2</sub> and CO+O reaction steps. Bold data: energy barrier of the rate-determining step for CO oxidation.

|                                           | Pt/Gr-       | Pt/Gr-       | Pt/Gr-       | Pt/NGr-      | Pt/NGr-      | Pt/NGr-o-    | Pt/NGr-p-    |
|-------------------------------------------|--------------|--------------|--------------|--------------|--------------|--------------|--------------|
| <i>Pt-Charge</i> (O <sub>2</sub> )/ e     | 0.180        | 0.090        | 0.199        | 0.231        | 0.252        | 0.071        | 0.126        |
| <i>ads-Charge</i> (O <sub>2</sub> )/ e    | -0.160       | -0.163       | -0.333       | -0.178       | -0.204       | -0.320       | -0.360       |
| $E_b$ (O <sub>2</sub> )/eV                | -1.056       | -1.608       | -1.555       | -1.650       | -2.854       | -1.848       | -1.049       |
| <i>Energy Barrier</i> /eV                 | 1.898        | 1.593        | 1.460        | 1.320        | 1.292        | 1.314        | 1.531        |
| <i>Pt-Charge</i> (CO+O <sub>2</sub> )/ e  | 0.144        | 0.110        | -0.018       | 0.207        | 0.265        | -0.250       | -0.059       |
| <i>ads-Charge</i> (CO+O <sub>2</sub> )/ e | -0.022       | -0.091       | -0.144       | -0.083       | -0.133       | -0.039       | -0.216       |
| $E_b$ (CO+O <sub>2</sub> )/eV             | -2.649       | -2.850       | -3.119       | -3.079       | -4.303       | -3.401       | -2.823       |
| <i>Energy Barrier</i> /eV                 | <b>0.743</b> | <b>1.158</b> | <b>0.911</b> | <b>0.557</b> | 0.195        | 0.442        | 0.870        |
| <i>Pt-Charge</i> (CO+O)/ e                | 0.257        | 0.194        | 0.179        | 0.297        | 0.450        | 0.128        | 0.080        |
| <i>ads-Charge</i> (CO+O)/ e               | -0.130       | -0.220       | -0.441       | -0.356       | -0.337       | -0.503       | -0.610       |
| $E_b$ (CO+O)/eV                           | -1.861       | -2.367       | -2.883       | -2.511       | -3.760       | -3.352       | -3.122       |
| <i>Energy Barrier</i> /eV                 | 0.632        | 0.710        | 0.833        | 0.469        | <b>0.300</b> | <b>1.055</b> | <b>1.213</b> |

For CO + O<sub>2</sub> adsorption on Pt/NGr-o-s, because of the large repulsive force of the adsorbed CO, the O<sub>2</sub> molecule cannot form a Pt-O bond with the surface Pt atom, as shown in Figure S6. Thus, electron transfer between the adsorbates (CO+O<sub>2</sub>) and Pt/NGr-o-s is much lower than in other configurations, making this a special state that does not follow the same rule as other states (sharp-tip electron-aggregation effect).

## 7. Correlations between the Polarization Charge of Reactants ( $\text{CO}+\text{O}_2/\text{CO}+\text{O}$ ) and Their Stability/Reactivity.

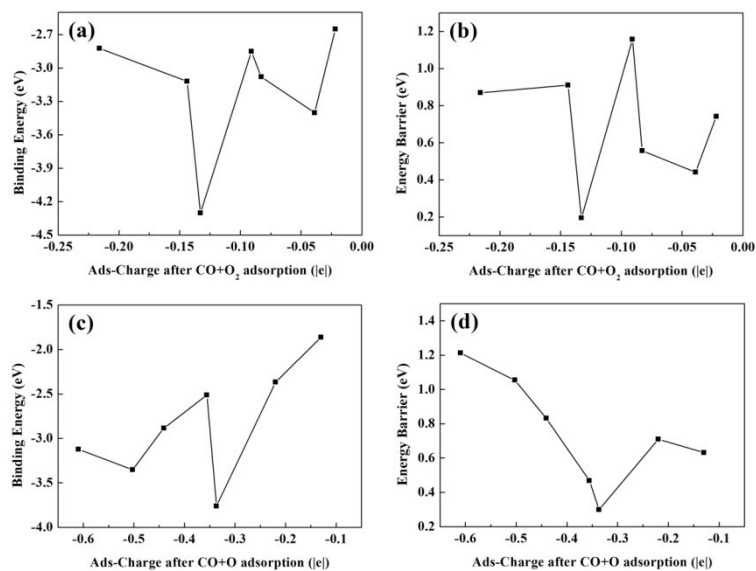

**Figure S13.** Correlations for the reactant ( $\text{CO}+\text{O}_2/\text{CO}+\text{O}$ ) polarization charge and its stability/reactivity. **Ads:** adsorbed reactant. Detailed charge and energy values are shown in Table S1.



## 8. The Diffusion Behaviors of Pt-SACs on Gr/NGr Supports.

From Figure S14, we note that the edge-path is much more favorable than center-path. Thus, we only test the different edge-paths (edge-N-path and edge-C-path) on NGr surfaces, as shown in Figure S14.

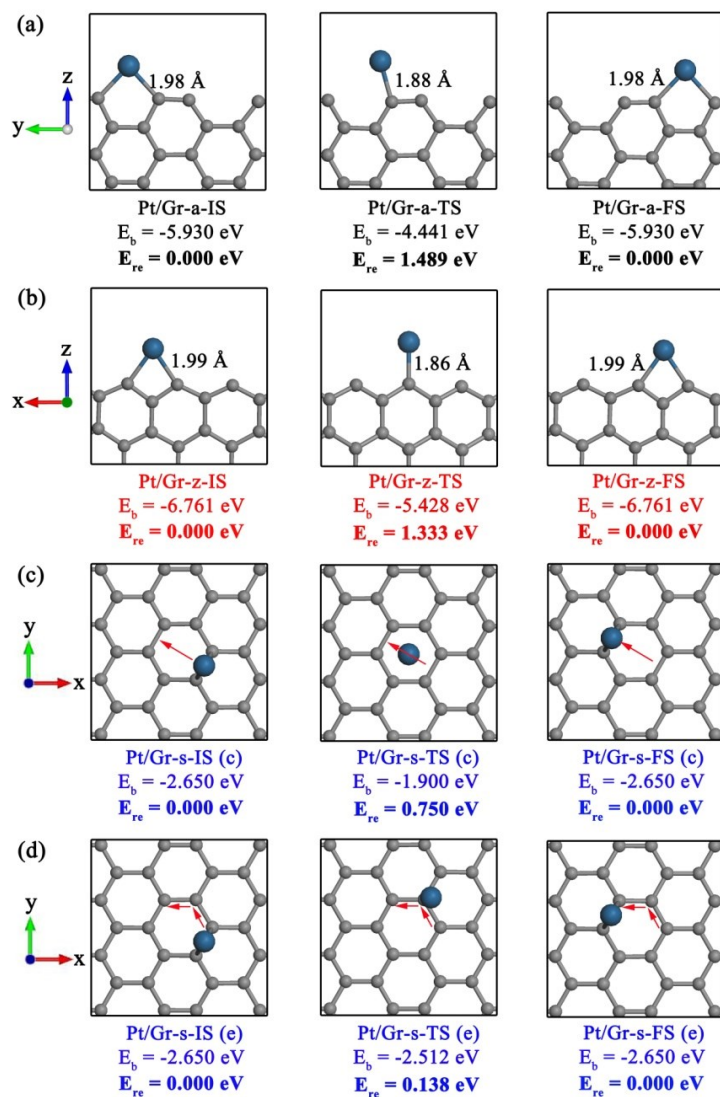

**Figure S14.** Optimized structures and binding ( $E_b$ ) and relative ( $E_{re}$ ) energies of the initial (I), transition (T) and final (F) states for Pt-diffusion reactions on **Pt/Gr-a (a)**, **Pt/Gr-z (b)** and **Pt/Gr-s ((c) and (d))** surfaces. **Pt/Gr-s-XX(c)**: the center-path on the Gr surface; **Pt/Gr-s-XX(e)**: the edge-path on the Gr surface. Red arrow: the diffusion path of single Pt atom. See the Figure S1 legend for color coding.

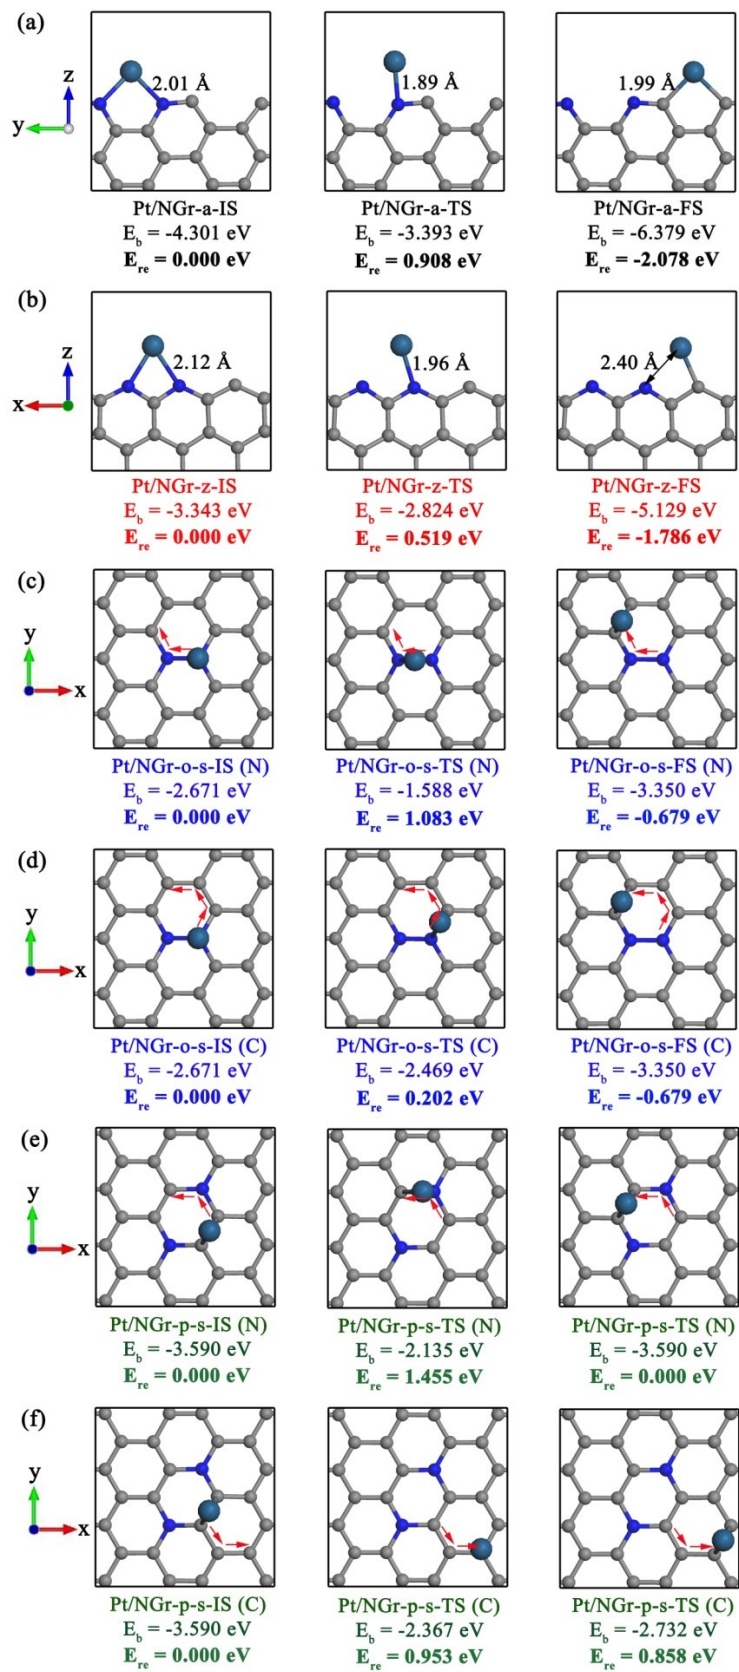

**Figure S15.** Optimized structures and binding ( $E_b$ ) and relative ( $E_{re}$ ) energies of the initial (I), transition (T) and final (F) states for Pt-diffusion reactions on **Pt/NGr-a** (a),

**Pt/NGr-z** (b), **Pt/NGr-o-s** ((c) and (d)) and **Pt/NGr-p-s** ((e) and (f)) surfaces. **Pt/NGr-x-s-XX(N)**: the edge-N-path on the NGr surface; **Pt/Gr-x-s-XX(C)**: the edge-C-path on the NGr surface. Red arrow: the diffusion path of single Pt atom. See the Figure S2 legend for color coding.

**Table S2.** Calculated binding energies ( $E_b$ ) and diffusion barriers (most favorable path) of Pt single atoms on Gr/NGr supports, the corresponding CO oxidation barriers (rate-determining step), and their energy differences ( $\Delta E$ ).  $\Delta E = E(\text{Diffusion Barrier}) - E(\text{CO oxidation Barrier})$ . According to this definition, positive value of  $\Delta E$  means a more stable active site under reaction conditions.

|                                              | Pt/Gr-a      | Pt/Gr-z      | Pt/Gr-s       | Pt/NGr-a     | Pt/NGr-z     | Pt/NGr-o-s    | Pt/NGr-p-s    |
|----------------------------------------------|--------------|--------------|---------------|--------------|--------------|---------------|---------------|
| <i><math>E_b(\text{Pt})/\text{eV}</math></i> | -5.930       | -6.761       | -2.650        | -4.301       | -3.343       | -2.671        | -3.590        |
| <i>Diffusion Barrier/eV</i>                  | 1.489        | 1.333        | 0.138         | 0.908        | 0.519        | 0.202         | 0.953         |
| <i>CO oxidation Barrier/eV</i>               | 0.743        | 1.158        | 0.911         | 0.557        | 0.300        | 1.055         | 1.213         |
| <i><math>\Delta E/\text{eV}</math></i>       | <b>0.746</b> | <b>0.175</b> | <b>-0.773</b> | <b>0.351</b> | <b>0.219</b> | <b>-0.853</b> | <b>-0.260</b> |

## 9. The Catalytic Performances and Diffusion Behaviors of Pt-SACs on Gr/N<sub>1</sub>Gr

Supports.

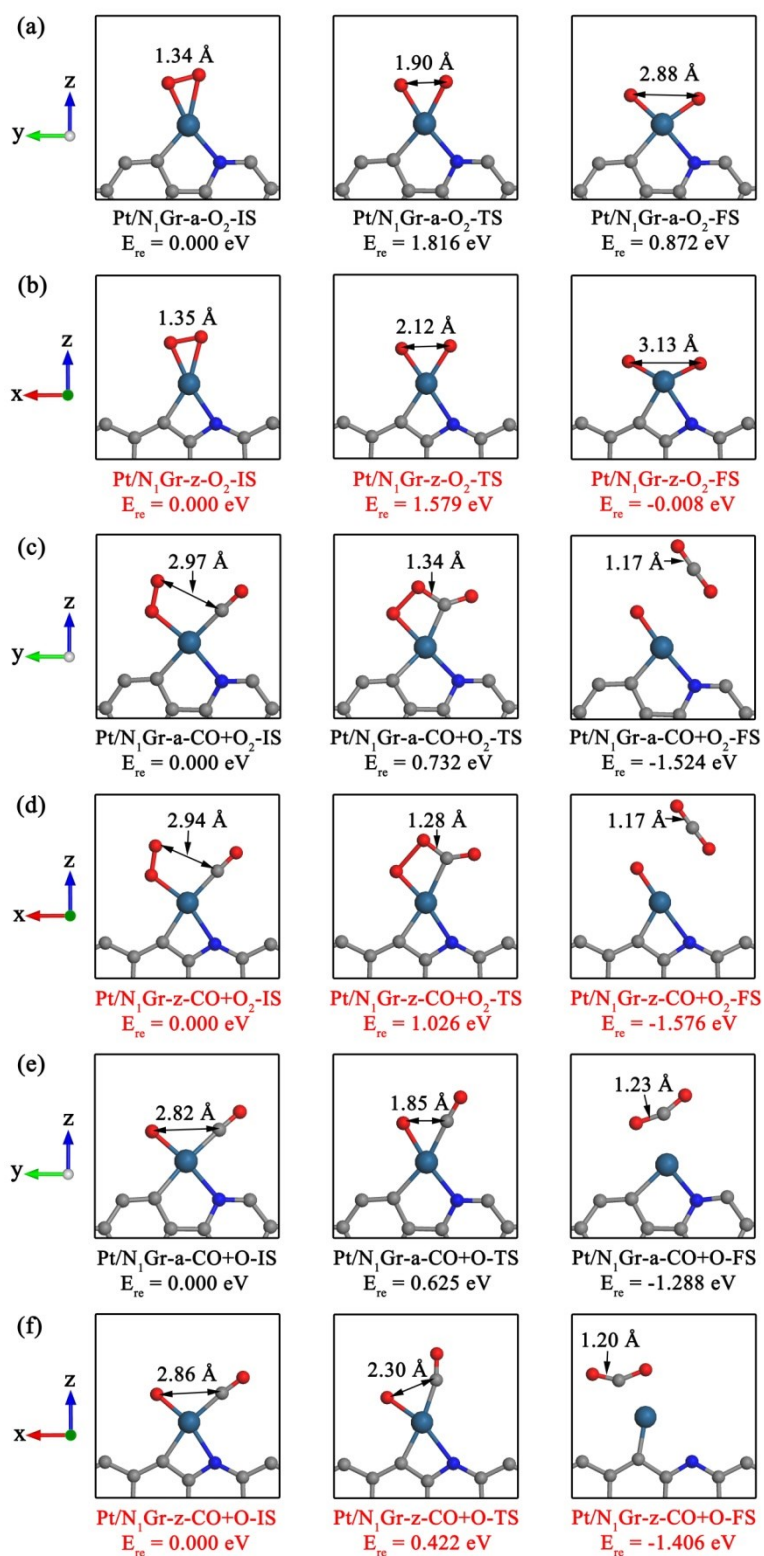

**Figure S16.** Optimized structures and relative energies of the initial (I), transition (T)

and final (F) states for  $O_2$  activation (**a**, **b**), and  $CO+O_2$  (**c**, **d**) and  $CO+O$  (**e**, **f**) reactions on **Pt/N<sub>1</sub>Gr-a** and **Pt/N<sub>1</sub>Gr-z** surfaces. The detailed binding energies of the reactants are shown in Table S3. See the Figure S2 legend for color coding.

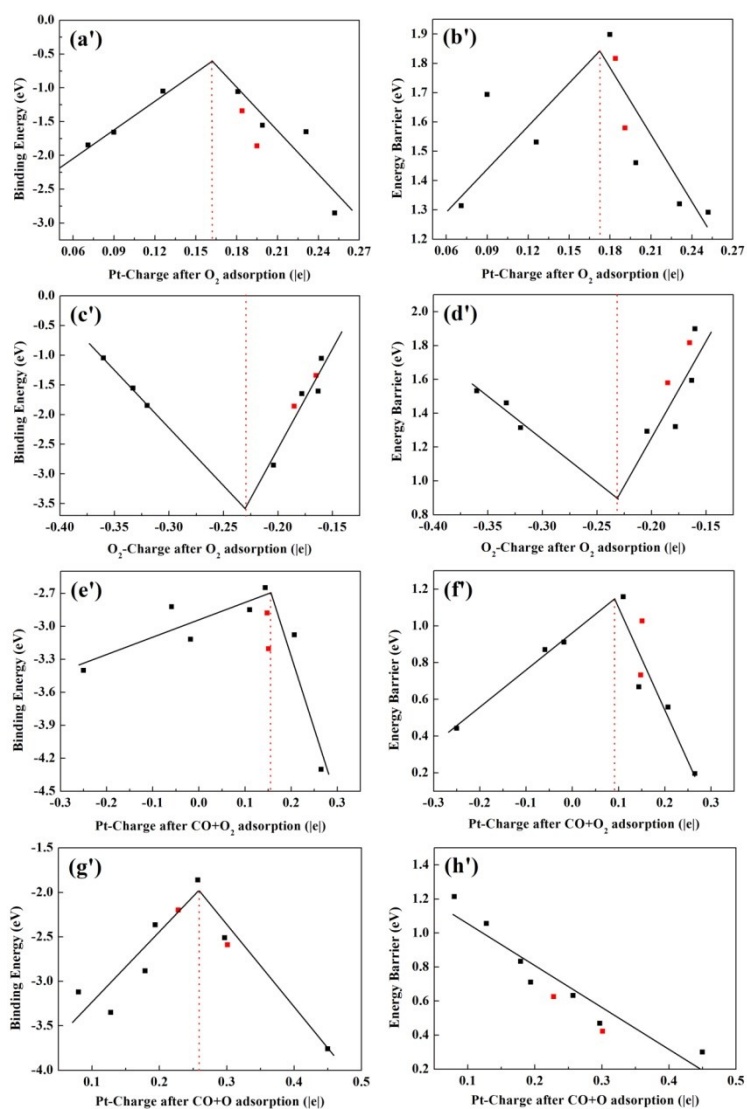

**Figure S17.** Correlations between the Pt/O<sub>2</sub> polarization charges and stability/reactivity of the reactants (O<sub>2</sub>, CO+O<sub>2</sub> and CO+O). Black dots: Pt/Gr and Pt/NGr; Red dots: Pt/N<sub>1</sub>Gr. Detailed charge and energy values are shown in Tables S1 and S3.

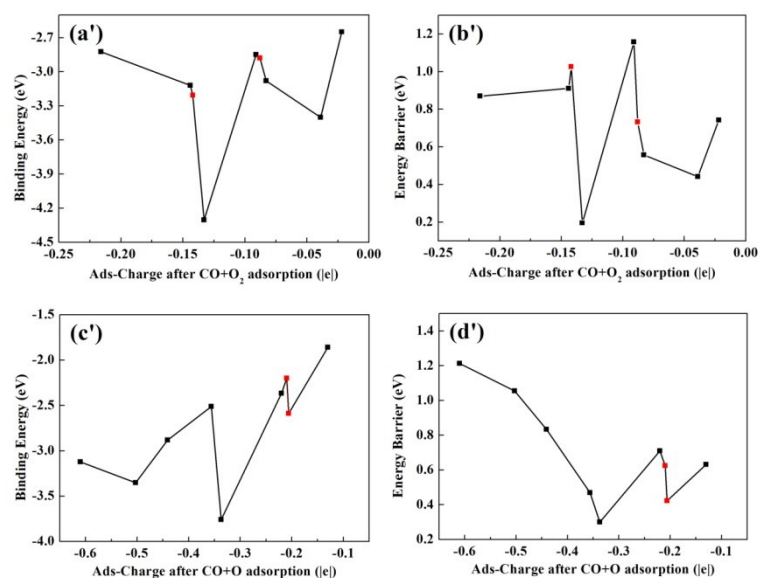

**Figure S18.** Correlations for the reactant (CO+O<sub>2</sub>/CO+O) polarization charge and its stability/reactivity. **Ads:** adsorbed reactant. Black dots: Pt/Gr and Pt/NGr; Red dots: Pt/N<sub>1</sub>Gr. Detailed charge and energy values are shown in Tables S1 and S3.

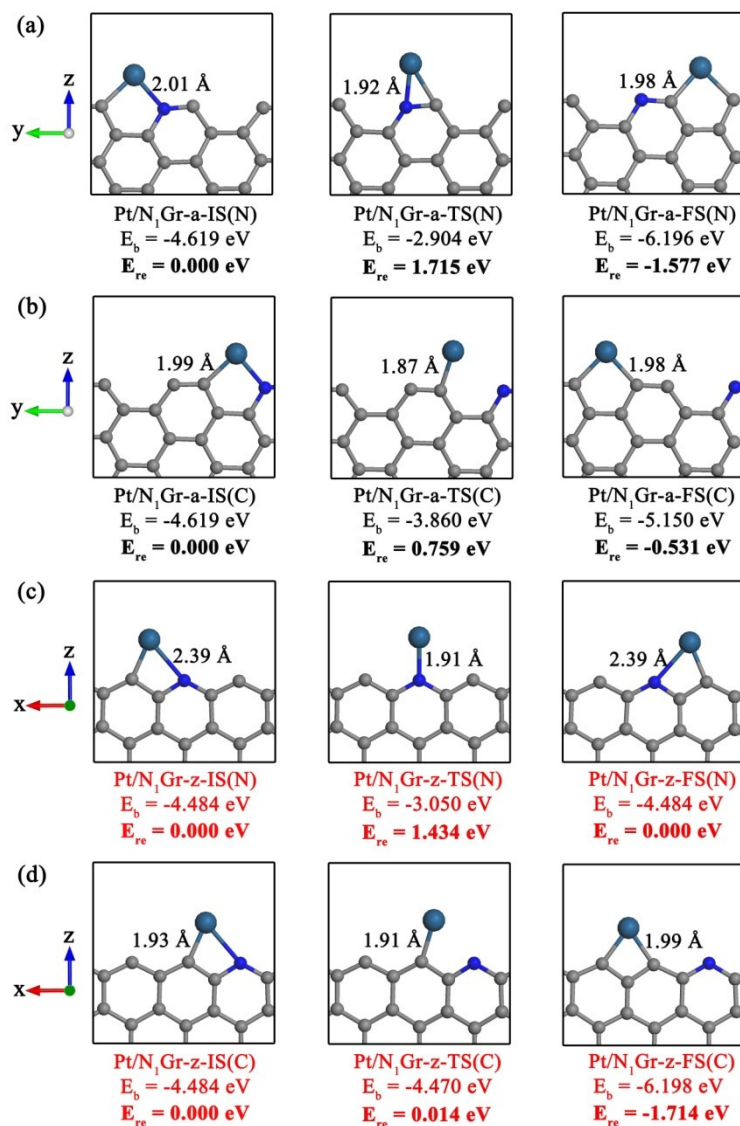

**Figure S19.** Optimized structures and binding ( $E_b$ ) and relative ( $E_{re}$ ) energies of the initial (I), transition (T) and final (F) states for Pt-diffusion reactions on **Pt/N<sub>1</sub>Gr-a** ((a) and (b)) and **Pt/N<sub>1</sub>Gr-z** ((c) and (d)) surfaces. **Pt/N<sub>1</sub>Gr-x-XX(N)**: Pt diffuses along the N side; **Pt/N<sub>1</sub>Gr-x-XX(C)**: Pt diffuses along the C side. See the Figure S2 legend for color coding.



**Table S3.** Calculated Pt and adsorbate (*ads*) charges after O<sub>2</sub>, CO+O<sub>2</sub> and CO+O adsorption on the edges of Pt/Gr, Pt/N<sub>1</sub>Gr and Pt/NGr catalysts; the corresponding binding energies (*E<sub>b</sub>*) and energy barriers for O<sub>2</sub> activation, and the CO+O<sub>2</sub> and CO+O reaction steps.

|                                              | Pt/Gr- | Pt/N <sub>1</sub> Gr- | Pt/NGr- | Pt/Gr- | Pt/N <sub>1</sub> Gr- | Pt/NGr- |
|----------------------------------------------|--------|-----------------------|---------|--------|-----------------------|---------|
| <i>Pt-Charge</i> (O <sub>2</sub> )/ e        | 0.180  | <b>0.184</b>          | 0.231   | 0.090  | <b>0.191</b>          | 0.252   |
| <i>ads-Charge</i> (O <sub>2</sub> )/ e       | -0.160 | <b>-0.165</b>         | -0.178  | -0.163 | <b>-0.185</b>         | -0.204  |
| <i>E<sub>b</sub></i> (O <sub>2</sub> )/eV    | -1.056 | <b>-1.342</b>         | -1.650  | -1.608 | <b>-1.861</b>         | -2.854  |
| <i>Energy Barrier</i> /eV                    | 1.898  | <b>1.816</b>          | 1.320   | 1.593  | <b>1.579</b>          | 1.292   |
| <i>Pt-Charge</i> (CO+O <sub>2</sub> )/ e     | 0.144  | <b>0.148</b>          | 0.207   | 0.110  | <b>0.151</b>          | 0.265   |
| <i>ads-Charge</i> (CO+O <sub>2</sub> )/ e    | -0.022 | <b>-0.088</b>         | -0.083  | -0.091 | <b>-0.142</b>         | -0.133  |
| <i>E<sub>b</sub></i> (CO+O <sub>2</sub> )/eV | -2.649 | <b>-2.879</b>         | -3.079  | -2.850 | <b>-3.206</b>         | -4.303  |
| <i>Energy Barrier</i> /eV                    | 0.743  | <b>0.732</b>          | 0.557   | 1.158  | <b>1.026</b>          | 0.195   |
| <i>Pt-Charge</i> (CO+O)/ e                   | 0.257  | <b>0.228</b>          | 0.297   | 0.194  | <b>0.301</b>          | 0.450   |
| <i>ads-Charge</i> (CO+O)/ e                  | -0.130 | <b>-0.210</b>         | -0.356  | -0.220 | <b>-0.206</b>         | -0.337  |
| <i>E<sub>b</sub></i> (CO+O)/eV               | -1.861 | <b>-2.200</b>         | -2.511  | -2.367 | <b>-2.590</b>         | -3.760  |
| <i>Energy Barrier</i> /eV                    | 0.632  | <b>0.625</b>          | 0.469   | 0.710  | <b>0.422</b>          | 0.300   |

**Table S4.** Calculated binding energies (*E<sub>b</sub>*) and diffusion barriers (most favorable path) of Pt single atoms on the edges of Gr/N<sub>1</sub>Gr/NGr supports, the corresponding CO oxidation barriers (rate-determining step), and their energy differences (*ΔE*).

|                              | Pt/Gr- | Pt/N <sub>1</sub> Gr- | Pt/NGr- | Pt/Gr- | Pt/N <sub>1</sub> Gr- | Pt/NGr- |
|------------------------------|--------|-----------------------|---------|--------|-----------------------|---------|
| <i>E<sub>b</sub></i> (Pt)/eV | -5.930 | <b>-4.619</b>         | -4.301  | -6.761 | <b>-4.484</b>         | -3.343  |
| <i>Diffusion Barrier</i> /eV | 1.489  | <b>0.759</b>          | 0.908   | 1.333  | <b>0.014</b>          | 0.519   |
| <i>CO oxidation</i>          | 0.743  | <b>0.732</b>          | 0.557   | 1.158  | <b>1.026</b>          | 0.300   |
| <i>ΔE</i> /eV                | 0.746  | <b>0.027</b>          | 0.351   | 0.175  | <b>-1.012</b>         | 0.219   |



## 10. The Activity of SACs on Perfect/Modified Gr/Gr-like Supports for CO Oxidation Reactions.

**Table S5.** The energy barriers (rate-determining step) of SACs on perfect/modified Gr/Gr-like supports for CO oxidation reactions, and their corresponding energy differences ( $\Delta E$ ).  $\Delta E = E(\text{Perfect}) - E(\text{Modified})$ .

| <i>Influence Factor</i>                | <i>Energy-barrier<br/>(Perfect-surface)</i> | <i>Energy-barrier<br/>(Modified-surface)</i> | <i>Energy-difference<br/>(<math>\Delta E</math>)</i> |
|----------------------------------------|---------------------------------------------|----------------------------------------------|------------------------------------------------------|
| <i>Edge-effect</i>                     | 1.21 eV                                     | <b>0.30 eV</b>                               | 0.91 eV                                              |
| <i>N-doping-edge</i>                   | 1.16 eV                                     | <b>0.30 eV</b>                               | 0.86 eV                                              |
| <i>N-doping-surface</i>                | 0.91 eV                                     | 1.06 eV                                      | -0.15 eV                                             |
| <i>C-Defect</i> <sup>17</sup>          | 1.03 eV                                     | 0.58 eV                                      | 0.45 eV                                              |
| <i>Surface-oxidation</i> <sup>18</sup> | 1.19 eV                                     | 0.58 eV                                      | 0.61 eV                                              |
| <i>Metal-varying</i> <sup>19</sup>     | 3.94 eV                                     | 0.56 eV                                      | <b>3.38 eV</b>                                       |

For edge-effect, *Perfect-surface* represents the Pt binding on the surface of NGr, and *Modified-surface* represents the Pt binding on the zigzag edge of NGr.

For metal-varying, *Perfect-surface* represents the metal (Ru) with highest energy barrier, and *Modified-surface* represents the metal (Pt) with lowest energy barrier.<sup>19</sup>

For different influence factors (including edge-effect, N-doping-edge, N-doping-surface, C-defect, surface oxidation), the metal for SACs all select the Pt.

## References

1. G. Kresse and J. Furthmüller, *Phys. Rev. B*, 1996, **54**, 11169.
2. J. P. Perdew, K. Burke and M. Ernzerhof, *Phys. Rev. Lett.*, 1996, **77**, 3865.
3. P. E. Blöchl, *Phys. Rev. B*, 1994, **50**, 17953.
4. G. Kresse and D. Joubert, *Phys. Rev. B*, 1999, **59**, 1758.
5. O. Bengone, M. Alouani, P. E. Blöchl and J. Hugel, *Phys. Rev. B*, 2000, **62**, 16392.
6. S. Grimme, *J. Comput. Chem.*, 2006, **27**, 1787.
7. I. Fampiou and A. Ramasubramaniam, *J. Phys. Chem. C*, 2015, **119**, 8703.
8. S. Liu and S. Huang, *Carbon*, 2017, **115**, 11.
9. T. A. Manz and N. G. Limas, *RSC Adv.*, 2016, **6**, 47771.
10. N. G. Limas and T. A. Manz, *RSC Adv.*, 2016, **6**, 45727.
11. Y. Wang, et al., *Nat. Commun.*, 2019, **10**, 1506.
12. W. Sun, et al., *Nat. Mater.*, 2019, **18**, 732.
13. X. Wang, G. Zhang, Z. Wang, L. Yang, X. Li, J. Jiang and Y. Luo, *Carbon*, 2019, **143**, 700.
14. G. Mills, H. Jonsson and G. K. Schenter, *Surf. Sci.*, 1995, **324**, 305.
15. G. Henkelman, B. P. Uberuaga and H. Jónsson, *J. Chem. Phys.*, 2000, **113**, 9901.
16. D. A. Bulushev, M. Zacharska, A. S. Lisitsyn, O. Y. Podyacheva, F. S. Hage, Q. M. Ramasse, U. Bangert and L. G. Bulusheva, *ACS Catal.*, 2016, **6**, 3442.
17. Y. Tang, Z. Yang and X. Dai, *Phys. Chem. Chem. Phys.*, 2012, **14**, 16566.
18. C. Jia, Y. Zhang, X. Wang, W. Zhong, O. V. Prezhdo, Y. Luo and J. Jiang, *J. Mater. Chem. A*, 2020, **8**, 12485.
19. T. Kropp and M. Mavrikakis, *ACS Catal.*, 2019, **9**, 6864.
